# Supplementary material for: Diurnal Pattern of Insulin Action in Type 1 Diabetes: Implications for a Closed-Loop System
Source: PubMed Central journal article supplement — Diabetes. 2013 Jun 14;62(7):2223–9. doi: 10.2337/db12-1759 (PMC3712033; doi:10.2337/db12-1759), 2013-06-14

SUPPLEMENTARY DATA

**Supplementary Table 1.** Meal Composition.

|          | <b>Carb<br/>(grams)</b> | <b>Carb<br/>%</b> | <b>Protein<br/>%</b> | <b>Fat<br/>%</b> | <b>Fiber<br/>(grams)</b> | <b>kcal</b>     |
|----------|-------------------------|-------------------|----------------------|------------------|--------------------------|-----------------|
| <b>B</b> | <b>53.2±0.7</b>         | <b>31.6±1.0</b>   | <b>28.8±1.2</b>      | <b>39.6±0.5</b>  | <b>0</b>                 | <b>689.4±26</b> |
| <b>L</b> | <b>52.5±0.4</b>         | <b>33.9±1.2</b>   | <b>26.6±1.1</b>      | <b>39.5±0.2</b>  | <b>0</b>                 | <b>640.0±25</b> |
| <b>D</b> | <b>53.0±0.7</b>         | <b>31.2±1.1</b>   | <b>28.6±1.1</b>      | <b>40.2±0.3</b>  | <b>0</b>                 | <b>694.3±26</b> |

SUPPLEMENTARY DATA

**Supplementary Figure 1.** Shows the mean and 95% pointwise Confidence Interval Band of glucose concentrations obtained during breakfast in healthy controls (Blue) {reference#1} and type 1 diabetes subjects (Orange).

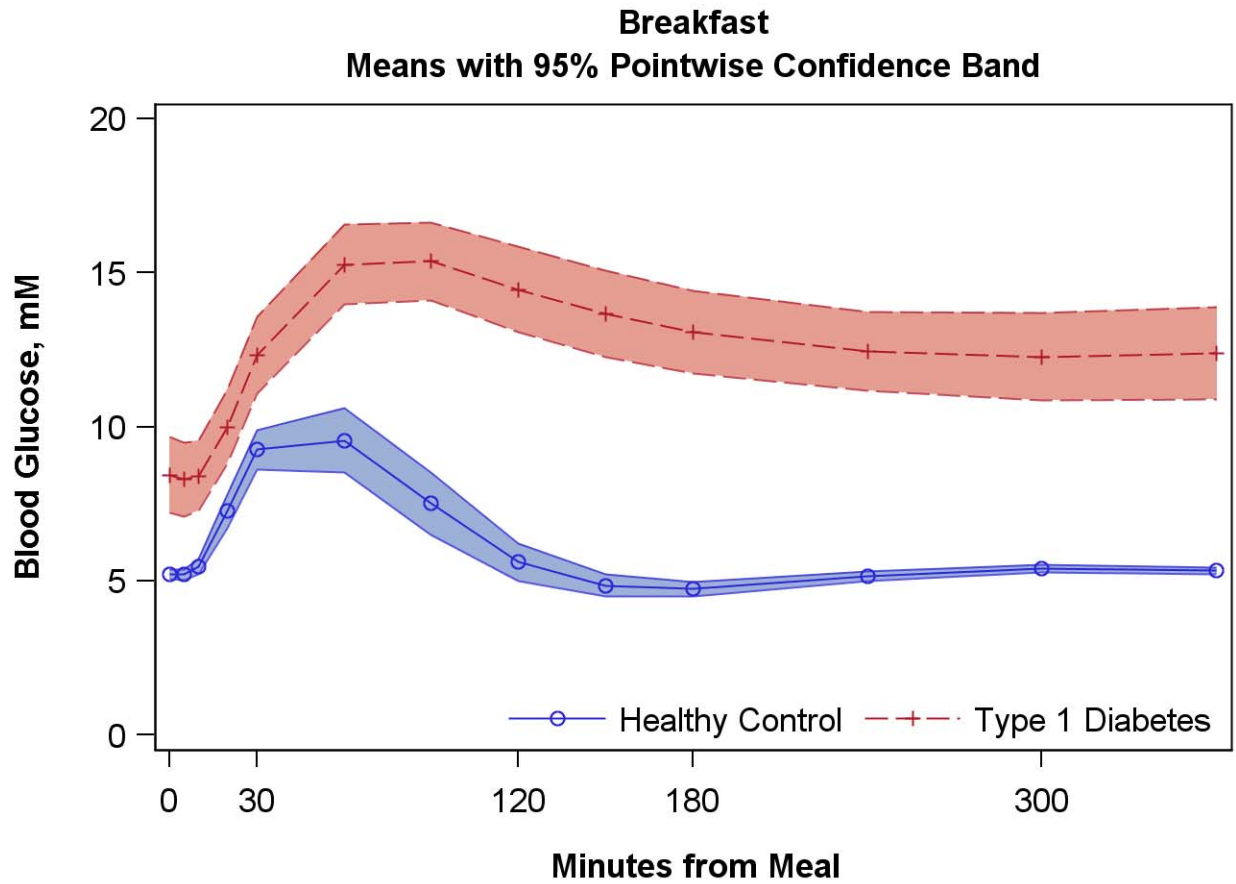

SUPPLEMENTARY DATA

**Supplementary Figure 2.** Shows the mean and 95% pointwise Confidence Interval Band of glucose concentrations obtained during lunch in healthy controls (Blue) {reference#1} and type 1 diabetes subjects (Orange).

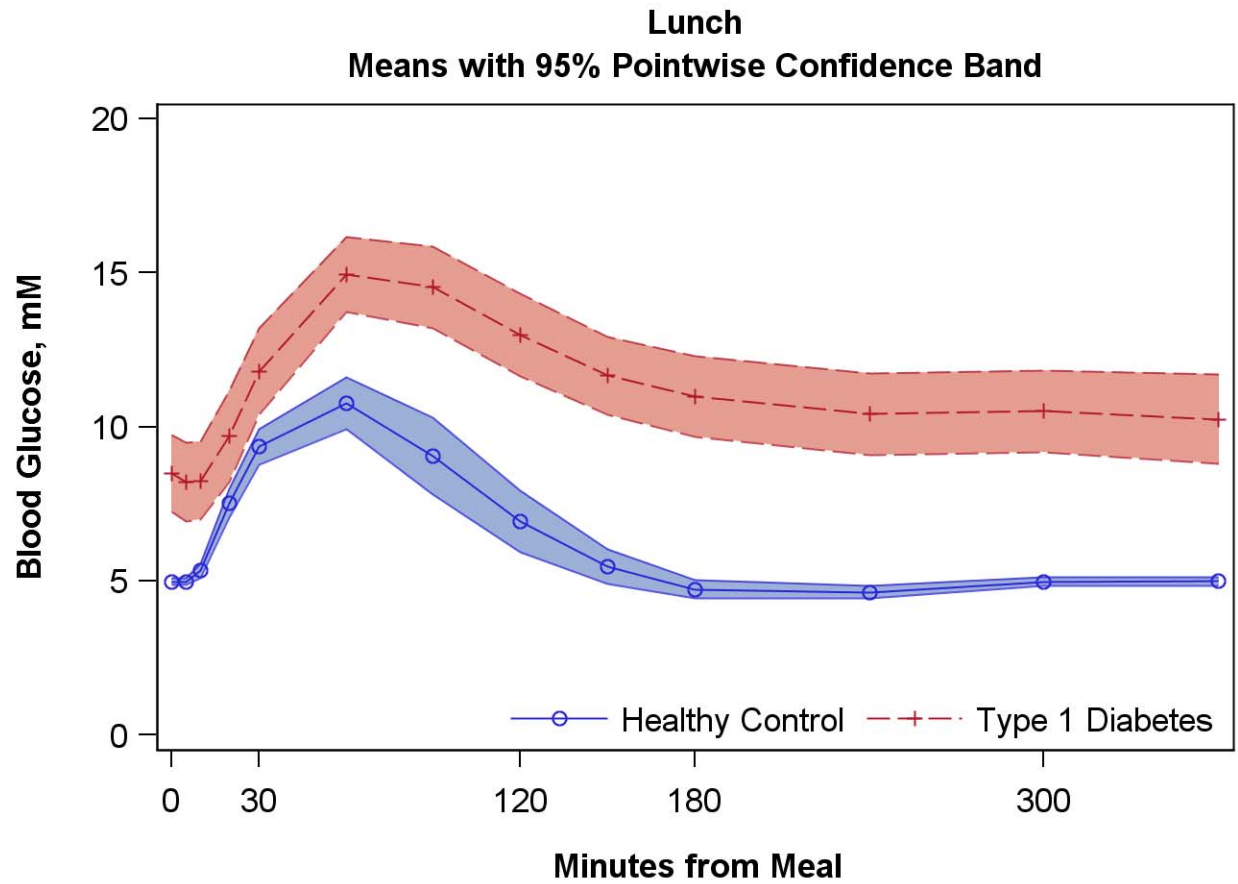

SUPPLEMENTARY DATA

**Supplementary Figure 3.** Shows the mean and 95% pointwise Confidence Interval Band of glucose concentrations obtained during dinner in healthy controls (Blue) {reference#1} and type 1 diabetes subjects (Orange).

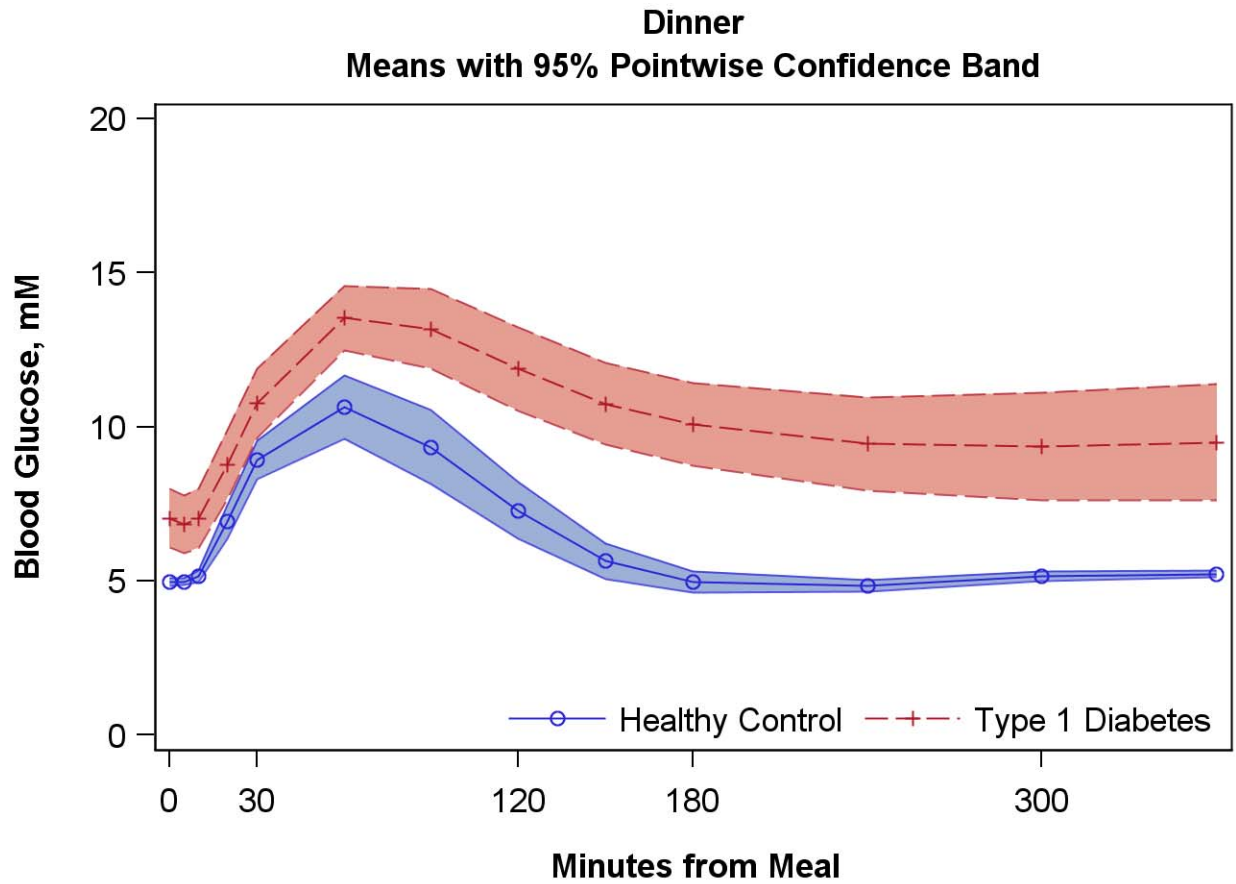

Supplement: supp_db12-1759_DB121759SupplementaryData.pdf [file supp_db12-1759_DB121759SupplementaryData.pdf]
